# Supplementary material for: Role of mitochondrial reactive oxygen species in age-related inflammatory activation of endothelium
Source: publisher site journal article supplement (doi:10.18632/aging.100685), 2014-08-13
Supplement: Supplementary file [file aging-v6i8-100685-supplementary-material-SD1.pdf]

**SUPPLEMENTARY DATA**

**Supplementary Table 1.** Primer sequences for qRT-PCR.

| Target gene | Organism | Forward (5'-3')          | Reverse (5'-3')         | Annealing temperature, °C |
|-------------|----------|--------------------------|-------------------------|---------------------------|
| ICAM1       | Mouse    | CAGGATATACAAGTTACAGAAGG  | TGACAGCCAGAGGAAGTG      | 56                        |
| TNF         | Mouse    | CGTGGAACTGGCAGAAGAG      | ACAAGCAGGAATGAGAAGAGG   | 58                        |
| VCAM        | Mouse    | GTGGAAATGTGCCCGAAAC      | GAGCCAACTTCAGTCTTAGATTC | 54                        |
| MCP-1       | Mouse    | CACTCACCTGCTGCTACTCATTC  | GCTTCTTTGGGACACCTGCTG   | 57                        |
| RPL32       | Mouse    | GGCACCAGTCAGACCGATATG    | CCTTCTCCGCACCCTGTTG     | 56                        |
| GAPDH       | Mouse    | TCCTGGAAGATGGTGATGGGATTT | TGGTCACCAGGGCTGCTTTTA   | 54                        |
| ICAM1       | Human    | TGTCATCATCACTGTGGTAGC    | CTTGTGTGTTCGGTTTCATGG   | 56                        |
| VCAM        | Human    | CTTCTCGTGCTCTATTTTG      | TTGACTTCTGTGCTTCTAC     | 54                        |
| E-selectin  | Human    | TGGTTGAGTGTGATGCTGTG     | CGTTGGCTTCTCGTTGTCC     | 58                        |
| RPL32       | Human    | CATCTCCTTCTCGGCATCA      | AACCTGTTGTCAATGCCTC     | 56                        |

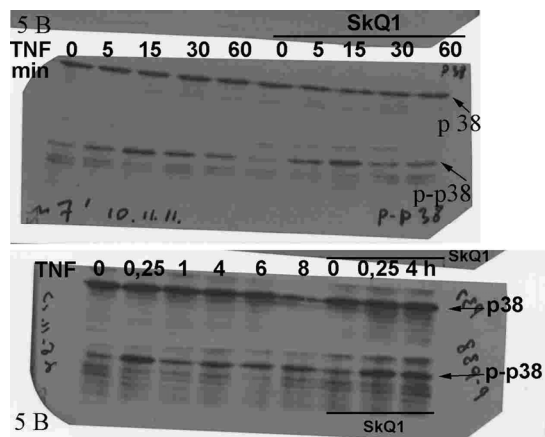

**Supplementary Data to Figure 5B**

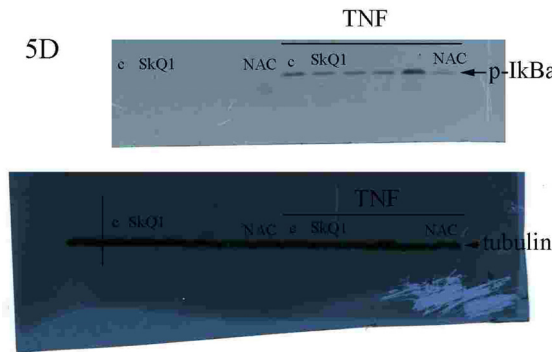

**Supplementary Data to Figure 5D**

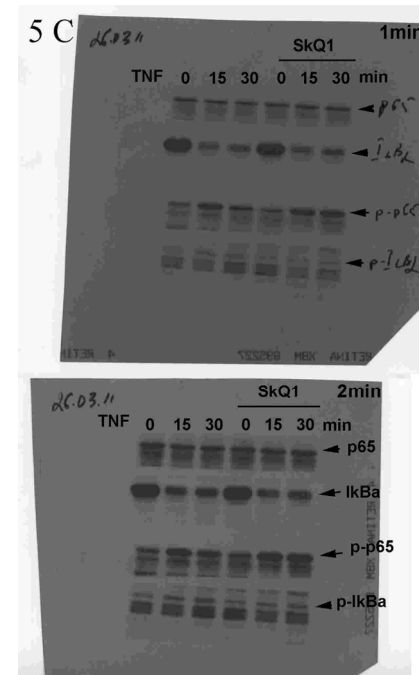

**Supplementary Data to Figure 5C**

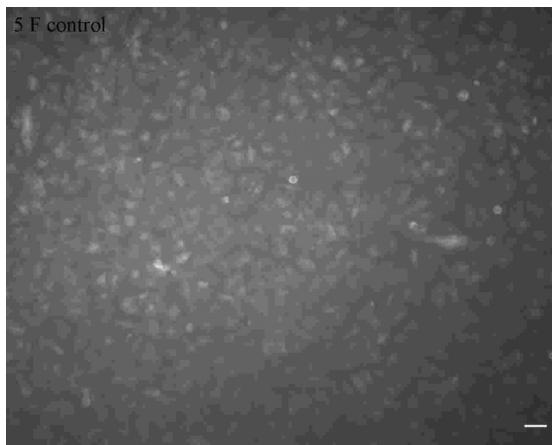

Supplementary Data to Figure 5F

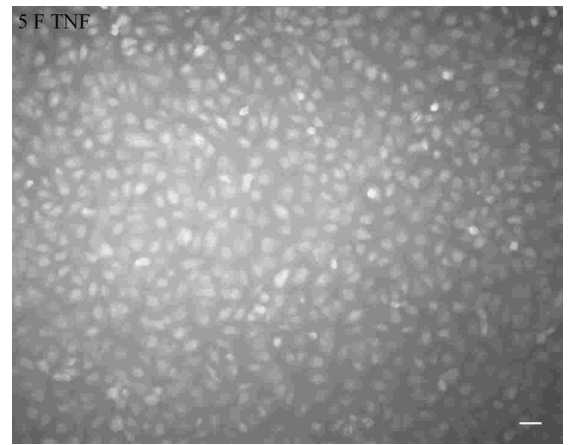

Supplementary Data to Figure 5F

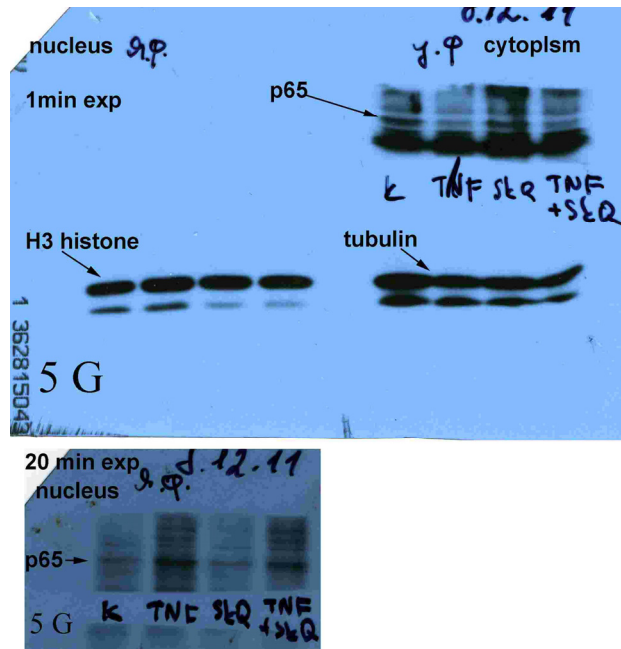

Supplementary Data to Figure 5G
